# Supplementary material for: RNase H1-Dependent Antisense Oligonucleotides Are Robustly Active in Directing RNA Cleavage in Both the Cytoplasm and the Nucleus
Source: PubMed Central journal article supplement — Mol Ther. 2017 Jun 27;25(9):2075–92. doi: 10.1016/j.ymthe.2017.06.002 (PMC5589097; doi:10.1016/j.ymthe.2017.06.002), 2017-06-27
Supplement: mmc1.pdf [file mmc1.pdf]

YMTHE, Volume 25

## **Supplemental Information**

### **RNase H1-Dependent Antisense Oligonucleotides Are Robustly Active in Directing RNA Cleavage in Both the Cytoplasm and the Nucleus**

**Xue-Hai Liang, Hong Sun, Joshua G. Nichols, and Stanley T. Crooke**

**RNase H1-dependent antisense oligonucleotides are robustly active in directing RNA cleavage in both the cytoplasm and the nucleus**

**Supplementary Materials**

RNase H1-dependent 5-10-5 gapmer PS/MOE ASOs

These ASOs are linked with phosphorothioate backbones, with 10 deoxynucleotides in the center and 5 nucleotides at both ends modified with 2'-O-Methoxyethyl (MOE). The 2'-MOE modified nucleotides are underlined. The numbers of the ASOs are Ionis ASO ID numbers.

|                |        |                              |
|----------------|--------|------------------------------|
| Human Drosha   | 25688  | <u>GCACTTCCTTTCCTCCATCT</u>  |
| Human Drosha   | 25689  | <u>TCGATACGGACAGAGCTTGG</u>  |
| Human Drosha   | 25690  | <u>ATCCCTTTCTTCCGCATGTG</u>  |
| Human NCL1     | 110074 | <u>GTCATCGTCATCCTCATCAT</u>  |
| Human Ago2     | 136761 | <u>AGCCGGGTGTGGTGCCTCTT</u>  |
| Human Ago2     | 136762 | <u>AAGAGCCGGGTGTGGTGCCT</u>  |
| Human Ago2     | 136765 | <u>GTCGTGCCTGCTGGAATGTT</u>  |
| Human Ago2     | 136785 | <u>GCTGGCCATCTGTTGGTCTG</u>  |
| Mouse SRB1     | 205382 | <u>CACCTCTGCCACGTACAGTG</u>  |
| Human SOD1     | 333632 | <u>TTTCTTCATTTCCACCTTTG</u>  |
| Human MALAT1   | 395254 | <u>GGCATATGCAGATAAATGTTC</u> |
| Mouse MALAT1   | 399479 | <u>CGGTGCAAGGCTTAGGAATT</u>  |
| U16 snoRNA     | 462026 | <u>CAGCAGGCAACTGTCGCTGA</u>  |
| Human SOD1     | 480774 | <u>AAGTGAAAAGATACATGACT</u>  |
| Human U4 snRNA | 479333 | <u>GGTATTGGGAAAAGTTTTC</u>   |
| Control ASO    | 129700 | <u>TAGTGCGGACCTACCCACGA</u>  |

Human U23 ASOs:

|        |                             |
|--------|-----------------------------|
| 483771 | <u>ACAGAAAGGAGCTCAATGAG</u> |
| 483772 | <u>GATAGACAGAAAGGAGCTCA</u> |
| 483773 | <u>CCACTGATAGACAGAAAGGA</u> |
| 483774 | <u>AACTGCCACTGATAGACAGA</u> |
| 483775 | <u>CCATAAACTGCCACTGATAG</u> |
| 483776 | <u>CGAATCCATAAACTGCCACT</u> |
| 483777 | <u>TCGTGCGAATCCATAAACTG</u> |
| 483778 | <u>TCTTCTCGTGCGAATCCATA</u> |
| 483779 | <u>TCTTCTTCTCGTGCGAAT</u>   |
| 483780 | <u>AATTCTCTTCTTCTCGTG</u>   |
| 483781 | <u>CTGTGAATTCTCTTCTTCT</u>  |
| 483782 | <u>TAGTTCTGTGAATTCTTCT</u>  |
| 483783 | <u>AATGCTAGTTCTGTGAATTC</u> |
| 483784 | <u>AAAATAATGCTAGTTCTGTG</u> |
| 483785 | <u>AAGGTAAAATAATGCTAGTT</u> |
| 483786 | <u>GACAGAAGGTAAAATAATGC</u> |
| 483787 | <u>GTAAAGACAGAAGGTAAAAT</u> |

483788 CCTCTGTAAAGACAGAAGGT  
483789 ATATACCTCTGTAAAGACAG  
483790 GCTAAATATACCTCTGTAAA  
483791 ATACAGCTAAATATACCTCT  
483792 TCACAATACAGCTAAATATA  
483793 ATGTCTCACAAATACAGCTAA

Oligonucleotide probes used for northern hybridization:

XL011, 5'-TTGCTCAGTAAGAATTTTCG-3', antisense, to U16 snoRNAs  
XL016, 5'-ACCACTCAGACCGCGTTCTCTCC-3', antisense, to U3 snoRNA  
XL019, 5'-ATTGCCAGTGCCGACTATAT-3', antisense, to U4 snRNA  
XL021, 5'-TGGAACGCTTCACGAATTTGCG-3', antisense, to U6 snRNA  
XL057, 5'-CTCAGCCTCCCGAGTAGCTG-3', antisense, to wild type 7SL RNA  
XL099, 5'-GAATGTCTCACAAATACAGCTAAAT-3', antisense, to U23 snoRNA  
XL104, 5'-GACGCAAATTACGACATCAT-3', antisense, to U16 snoRNA  
XL272, 5'-CAGCAGGCAACTGTCGCTGA-3', antisense, to both U16 and 7SLm RNAs  
XL297, 5'-CTACAGCCCAGCGCAACTCAGC-3', antisense, 3' probe for 7SLm RNA  
XL299, 5'-GTCGCTGACCTGGACTCAA-3', antisense, 5' probe for 7SLm RNA

siRNAs:

Luciferase siRNA: sense sequence: 5'-CGUACGCGGAAUACUUCGAtt  
Drosha siRNA was purchased from Invitrogen, ID No: HSS178991  
RNase H1 siRNA was purchased from Ambion (ID No: S48357, Cat. No: 4390826)  
RNase H2 siRNA was purchased from Ambion (ID No: S20658, Cat. No. 4392420)  
XRN2 siRNA was purchased from Invitrogen (ID No: HSS117664)

Primer probe sets used for qRT-PCR:

Human NCL1 mRNA

Forward: 5'-GCTTGGCTTCTTCTGGACTCA-3'  
Reverse: 5'-TCGCGAGCTTCACCATGA-3'  
Probe: 5'-CGCCACTTGTCCGCTTCACACTCC-3'

Human DROSHA mRNA:

Forward: 5'-CAAGCTCTGTCCGTATCGATCA  
Reverse: 5'-TGGACGATAATCGGAAAAGTAATCA  
Probe: 5'-CTGGATCGTGAACAGTTCAACCCCGAT

Human MALAT1 RNA:

Forward: 5'-GCTTGGCTTCTTCTGGACTCA -3'  
Reverse: 5'-TCGCGAGCTTCACCATGA -3'  
Probe: 5'-CGCCACTTGTCCGCTTCACACTCC-3'

Human U16 RNA:

Forward: 5'-CTTGCAATGATGTCGTAATTTGC-3'

Reverse: 5'-TCGTCAACCTTCTGTACCAGCTT-3'  
Probe: 5'-TTACTCTGTTCTCAGCGACAGTTGCCTGC-3'

Mouse MALAT1:

Forward: 5'-TGGGTTAGAGAAGGCGTGTACTG-3'  
Reverse: 5'-TCAGCGGCAACTGGGAAA-3'  
Probe: 5'-CGTTGGCACGACACCTTCAGGGACT-3'

Mouse SRB1 mRNA:

Forward: 5'-TGACAACGACACCGTGTCT-3'  
Reverse: 5'-ATGCGACTTGTCAGGCTGG-3'  
Probe: 5'-CGTGGAGAACCGCAGCCTCCATT-3'

Human SOD1 mRNA:

Forward: 5'-CTCTCAGGAGACCATTGCATCA-3'  
Reverse: 5'-TCCTGTCTTTGTACTTTCTTCATTTCC-3'  
Probe: 5'-CCGCACACTGGTGGTCCATGAAAA-3'

Human SOD1, pre-mRNA (E4/I4):

Forward: 5'-TCTGTGATCTCACTCTCAGGAG-3'  
Reverse: 5'-TGGATCTTTAGAAACCGCGAC-3'  
Probe: 5'-CATTGCATCATTGGCCGCACACT-3'

Human SOD1, pre-mRNA (I1/E2)

Forward: 5'-TTTTCCACTCCCAAGTCTGG-3'  
Reverse: 5'-AATGCTTCCCCACACCTTC-3'  
Probe: 5'-CTGTGAGGGGTAAAGGTAAATCAGCTGT-3'

Human NCL1 pre-mRNA (E13):

Forward: 5'-CTCTGTCACTGGTATCTTTTCCC-3'  
Reverse: 5'-CAAAACCAAACCTAGAACACCAAATG-3'  
Probe: 5'-CAAGGCTACTTTCTGTGGGATGGCT-3'

Human NCL1 pre-mRNA (E3):

Forward: 5'-GGCTGGACTTACTGGTTTGG-3'  
Reverse: 5'-TGCTTTCTTGGCTGGTGTG-3'  
Probe: 5'-AAGAAGGTGGTCGTTTCCCCAACA-3'

Drosha pre-mRNA:

Forward: 5'-GATTATGACCGAGGGAGAACAC-3'  
Reverse: 5'-ATGCCCTACTGGATCCTTTTG-3'  
Probe: 5'-TAAATGGAGAATGACCGTGCCTGGG-3'

Ago2 pre-mRNA:

Forward: 5'-ACGGACAATCAGACCTCAAC-3'  
Reverse: 5'-TGGATTCCACAGGGCAGC-3'  
Probe: 5'-CCGGGACTGACACTCACCAATTTGCT-3'

RNase H1 mRNA:

Forward: 5'-CCTGTACTTACTGGTGTGGAAAATAGC-3'

Reverse: 5'-CCGTGTGAAAGACGCATCTG-3'

Probe: 5'-TGCAGGTAGGACCATTGCAGTGATGG-3'

RNase H2 mRNA:

Forward: 5'-CCTGTACTTACTGGTGTGGAAAATAGC-3'

Reverse: 5'-CCGTGTGAAAGACGCATCTG-3'

Probe: 5'-TGCAGGTAGGACCATTGCAGTGATGG-3'

28S rRNA:

Forward: 5'- CAGGTCTCCAAGGTGAACAG -3'

Reverse: 5'- CTTAGAGCCAATCCTTATCCCG-3'

Probe: 5'- TCCCTTACCTACATTGTTCCAACATGCC -3'

7SL RNA:

Forward: 5'- GCACTAAGTTCGGCATCAATATG -3'

Reverse: 5'- AGTGCAGTGGCTATTCACAG-3'

Probe: 5'- TCGGAAACGGAGCAGGTCAAACACT -3'
